# Supplementary material
Source: publisher figshare collection journal article supplement (https://osapublishing.figshare.com/ndownloader/files/8312627)
Supplement: Supplementary file 1 [file 8312627]

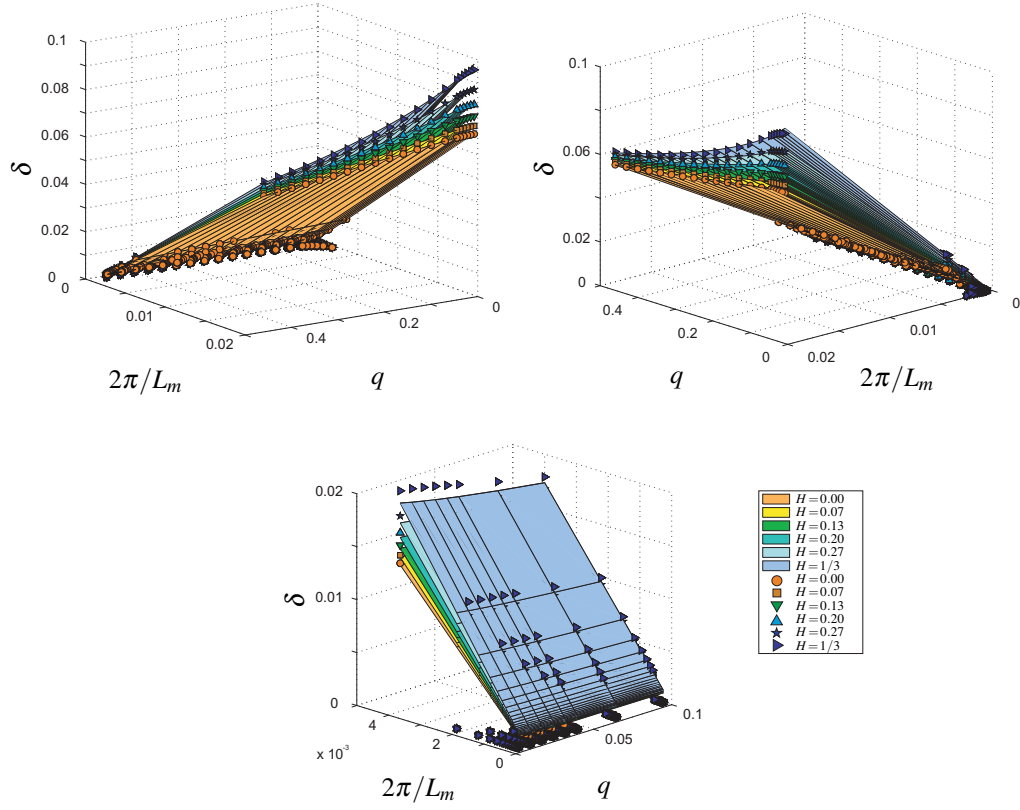

Media 1. Extended view from Fig. 9: The plotted points represents the changes in the maximum location with respect to the inverse of the adimensional scale,  $2\pi/L_m$ , and the scale ratio,  $q$ , for different values of  $H$ . The surface that fits these points follow Eq. (24).
